# Supplementary material for: Brief Communication: Sensitivity analysis of peak water to ice thickness and temperature: A case study in the Western Kunlun Mountains of the Tibetan plateau
Source: Copernicus journal article supplement (doi:10.5194/egusphere-2025-3460), 2025-08-26
Supplement: Supplementary file 1 [file egusphere-2025-3460-supplement.pdf]

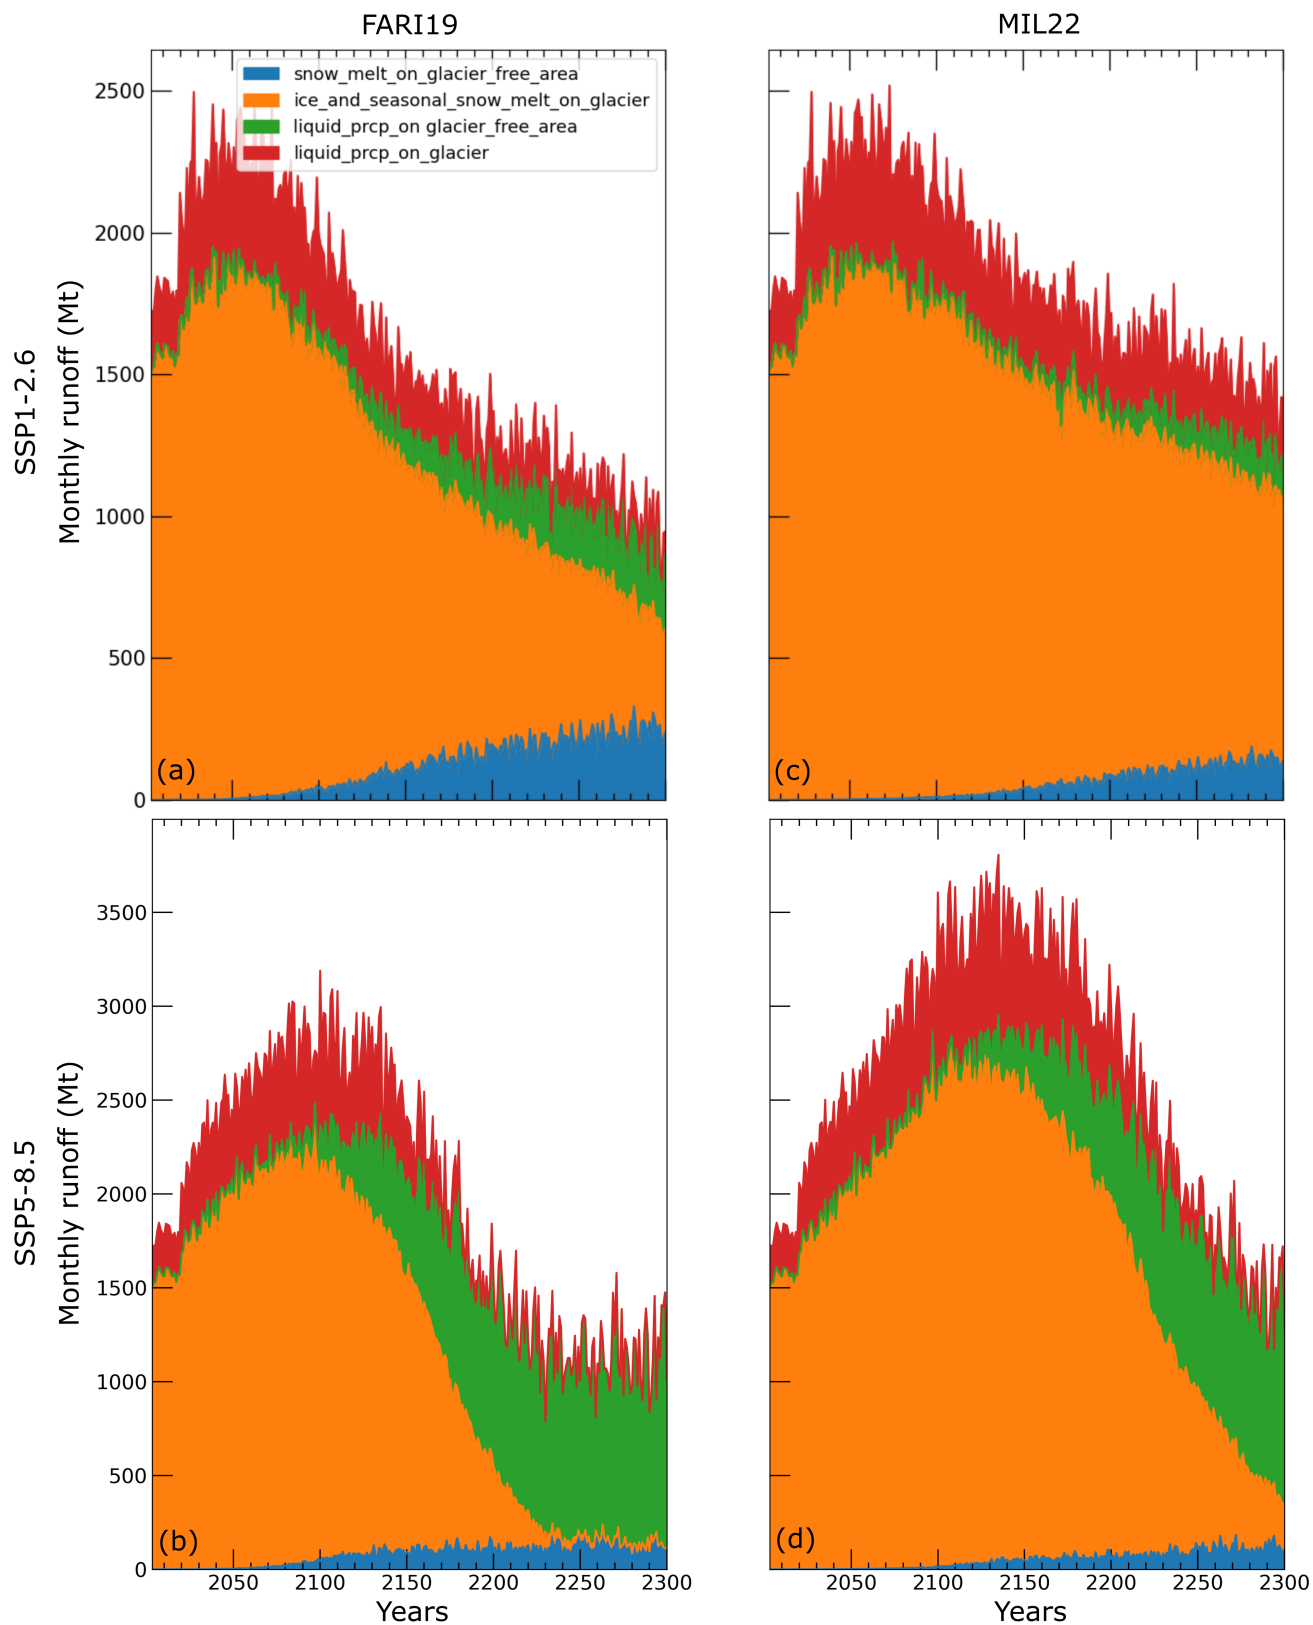

**Figure S1.** Simulated evolution of annual runoff with its four different contributions, using FARI19 dataset ((a) & (b)), and MIL22 dataset ((c) & (d)) under SSP1-2.6 and SSP5-8.5 respectively.
